# Supplementary material for: Syntheses, structures and properties of metal phosphates Pb2Mg(PO4)2, Pb4Zn8(PO4)8and α-BaZn2(PO4)2
Source: Royal Society of Chemistry journal article supplement (doi:10.1039/c7dt03055j), 2017-01-01
Supplement: c7dt03055j1.pdf [file c7dt03055j1.pdf]

## Syntheses, Structures and Properties of Metal Phosphates

### **Pb<sub>2</sub>Mg(PO<sub>4</sub>)<sub>2</sub>, Pb<sub>4</sub>Zn<sub>8</sub>(PO<sub>4</sub>)<sub>8</sub> and α-BaZn<sub>2</sub>(PO<sub>4</sub>)<sub>2</sub>**

Xiaobo Pan<sup>a</sup>, Ming Wen<sup>b</sup>, Guijie He<sup>c</sup>, Hongyi Li<sup>d\*</sup> and Diansheng Jia<sup>a\*</sup>

<sup>a</sup> *Key Laboratory of Energy Materials Chemistry, Ministry of Education, Key Laboratory of Advanced Functional Materials, Autonomous Region, Institute of Applied Chemistry, Xinjiang University, Urumqi, Xinjiang 830046, China. Fax: +86 991 8580032; Tel: (86) 991 8583083.*

<sup>b</sup> *School of Chemistry and Chemical Engineering, Harbin Institute of Technology, Harbin 150001, P.R. China*

<sup>c</sup> *School of Physics Science and Technology, Xinjiang University, Urumqi 830046, China.*

<sup>d</sup> *Xinjiang Products Quality Supervision & Inspection Institute of Technology, Urumqi 830011, China.*

*To whom correspondence should be addressed:*

*E-mail: [jdz@xju.edu.cn](mailto:jdz@xju.edu.cn) (Diansheng Jia); [lihongyi007007@163.com](mailto:lihongyi007007@163.com) (Hongyi Li).*

## Single Crystal data

**Table S1.** Atomic coordinates ( $\times 10^4$ ), equivalent isotropic displacement parameters ( $\text{\AA}^2 \times 10^3$ ) and BVS for  $\text{Pb}_2\text{Mg}(\text{PO}_4)_2$

| Atom  | x         | y       | z        | U(eq) <sup>[a]</sup> | BVS <sup>[b, c]</sup> |
|-------|-----------|---------|----------|----------------------|-----------------------|
| Pb(1) | 2610(1)   | 7327(1) | 3155(1)  | 12(1)                | 1.958                 |
| Pb(2) | -2449(1)  | 4913(1) | 3210(1)  | 12(1)                | 1.775                 |
| Mg(1) | 7779(11)  | 8631(3) | 4761(6)  | 10(1)                | 1.977                 |
| P(1)  | 2454(7)   | 5745(3) | 778(5)   | 7(1)                 | 4.893                 |
| P(2)  | 2589(8)   | 3362(3) | 4087(5)  | 8(1)                 | 4.836                 |
| O(1)  | 6720(20)  | 8195(8) | 2659(15) | 18(3)                | 1.946                 |
| O(2)  | -1010(20) | 7393(8) | 5266(15) | 18(3)                | 1.872                 |
| O(3)  | 4650(20)  | 6361(8) | 1203(14) | 16(3)                | 1.998                 |
| O(4)  | 200(20)   | 5989(8) | 1855(14) | 15(3)                | 1.992                 |
| O(5)  | -1530(20) | 4000(8) | 911(15)  | 18(3)                | 1.987                 |
| O(6)  | 1100(20)  | 4187(8) | 4294(14) | 16(3)                | 2.022                 |
| O(7)  | 3060(30)  | 4810(8) | 979(15)  | 19(3)                | 1.908                 |
| O(8)  | 5130(30)  | 3476(9) | 5023(15) | 23(3)                | 1.850                 |

[a] U(eq) is defined as one third of the trace of the orthogonalized  $U_{ij}$  tensor.

[b] Bond valences calculated with the program Bond Valence Calculator Version 2.00, C. Hormillosa, S. Healy, T. Stephen, McMaster University, 1993;

[c] Valence sums calculated with the formula:  $S_i = \exp[(R_0 - R_i)/B]$ , where  $S_i$  = valence of bond "i" and  $B = 0.37$ .

**Table S2.** Atomic coordinates ( $\times 10^4$ ) and equivalent isotropic displacementparameters ( $\text{\AA}^2 \times 10^3$ ) for  $\text{Pb}_4\text{Zn}_8(\text{PO}_4)_8$ 

| Atoms | x       | y        | z       | U(eq) <sup>[a]</sup> | BVS <sup>[b, c]</sup> |
|-------|---------|----------|---------|----------------------|-----------------------|
| Pb(1) | 2509(1) | 6975(1)  | 1246(1) | 11(1)                | 1.965                 |
| Pb(2) | 5033(1) | 9486(1)  | 1242(1) | 11(1)                | 1.977                 |
| Pb(3) | 5347(1) | 4813(1)  | 1260(1) | 11(1)                | 1.938                 |
| Pb(4) | 2849(1) | 2276(1)  | 1246(1) | 12(1)                | 1.967                 |
| Zn(1) | 582(1)  | 7883(1)  | -328(1) | 9(1)                 | 2.091                 |
| Zn(2) | 3256(1) | 5528(1)  | -326(1) | 10(1)                | 2.139                 |
| Zn(3) | 4234(1) | 11968(1) | 324(1)  | 9(1)                 | 2.116                 |
| Zn(4) | 3339(1) | 4653(1)  | 2168(1) | 10(1)                | 2.002                 |
| Zn(5) | 3729(1) | 9819(1)  | 2163(1) | 10(1)                | 1.954                 |
| Zn(6) | 1908(1) | 4664(1)  | 328(1)  | 10(1)                | 2.096                 |
| Zn(7) | 1140(1) | 7393(1)  | 2173(1) | 9(1)                 | 1.988                 |
| Zn(8) | 5912(1) | 7059(1)  | 2158(1) | 10(1)                | 1.909                 |
| P(1)  | 4178(1) | 7151(2)  | 1900(1) | 7(1)                 | 4.937                 |
| P(2)  | 1619(1) | 4675(2)  | 1897(1) | 7(1)                 | 4.993                 |
| P(3)  | 1991(1) | 9917(2)  | 1907(1) | 7(1)                 | 4.878                 |
| P(4)  | 4450(1) | 12480(2) | 1897(1) | 7(1)                 | 4.954                 |
| P(5)  | 6025(1) | 7166(2)  | 612(1)  | 7(1)                 | 5.063                 |
| P(6)  | 3447(1) | 9568(2)  | 608(1)  | 7(1)                 | 5.005                 |
| P(7)  | 936(1)  | 7107(2)  | 611(1)  | 7(1)                 | 5.014                 |
| P(8)  | 3513(1) | 4653(2)  | 611(1)  | 7(1)                 | 4.982                 |
| O(1)  | 1619(2) | 10550(4) | 2293(1) | 12(1)                | 2.020                 |
| O(2)  | 5519(2) | 7383(5)  | 220(1)  | 12(1)                | 2.115                 |
| O(3)  | 4518(2) | 10984(4) | 1960(1) | 13(1)                | 1.912                 |
| O(4)  | 1994(2) | 8400(5)  | 1957(1) | 14(1)                | 1.877                 |
| O(5)  | 5261(2) | 13069(4) | 1871(1) | 11(1)                | 1.994                 |
| O(6)  | 3564(2) | 10419(5) | 217(1)  | 13(1)                | 2.117                 |
| O(7)  | 3524(2) | 6155(4)  | 1818(1) | 11(1)                | 1.983                 |
| O(8)  | 3042(2) | 5032(5)  | 977(1)  | 17(1)                | 1.931                 |

|       |         |          |         |       |       |
|-------|---------|----------|---------|-------|-------|
| O(9)  | 4928(2) | 6369(5)  | 1956(1) | 14(1) | 1.886 |
| O(10) | 3014(2) | 4920(5)  | 219(1)  | 14(1) | 2.121 |
| O(11) | 2686(2) | 8832(5)  | 563(1)  | 18(1) | 1.955 |
| O(12) | 3661(2) | 3158(4)  | 646(1)  | 14(1) | 2.106 |
| O(13) | 1041(2) | 7969(4)  | 221(1)  | 13(1) | 2.114 |
| O(14) | 5542(3) | 7523(5)  | 972(1)  | 18(1) | 1.967 |
| O(15) | 982(2)  | 3638(4)  | 1823(1) | 10(1) | 1.990 |
| O(16) | 4268(2) | 5400(4)  | 571(1)  | 14(1) | 1.930 |
| O(17) | 4013(2) | 13097(5) | 2265(1) | 10(1) | 2.034 |
| O(18) | 4164(2) | 8160(5)  | 1561(1) | 16(1) | 1.983 |
| O(19) | 6761(2) | 7952(5)  | 572(2)  | 20(1) | 1.972 |
| O(20) | 181(2)  | 6340(5)  | 564(2)  | 18(1) | 1.933 |
| O(21) | 2819(2) | 10418(4) | 1861(1) | 11(1) | 1.923 |
| O(22) | 1421(2) | 5536(4)  | 2279(1) | 13(1) | 2.068 |
| O(23) | 1605(2) | 6130(5)  | 653(1)  | 14(1) | 2.094 |
| O(24) | 4110(2) | 8588(5)  | 652(1)  | 17(1) | 2.087 |
| O(25) | 6203(3) | 5687(5)  | 656(1)  | 17(1) | 2.086 |
| O(26) | 1627(2) | 5614(5)  | 1541(1) | 16(1) | 2.010 |
| O(27) | 2370(2) | 3941(5)  | 1976(1) | 14(1) | 1.924 |
| O(28) | 3507(3) | 10490(5) | 974(1)  | 18(1) | 1.943 |
| O(29) | 996(3)  | 8002(5)  | 977(1)  | 17(1) | 1.964 |
| O(30) | 4014(2) | 12890(5) | 1515(1) | 15(1) | 1.997 |
| O(31) | 1520(2) | 10420(5) | 1544(1) | 20(1) | 1.917 |
| O(32) | 4031(2) | 7966(5)  | 2298(1) | 11(1) | 2.015 |

[a]  $U(eq)$  is defined as one third of the trace of the orthogonalized  $U_{ij}$  tensor.

[b] Bond valences calculated with the program Bond Valence Calculator Version 2.00,  
C. Hormillosa, S. Healy, T. Stephen, McMaster University, 1993;

[c] Valence sums calculated with the formula:  $S_i = \exp[(R_0 - R_i)/B]$ , where  $S_i$  =  
valence of bond "i" and  $B = 0.37$ .

**Table S3.** Atomic coordinates ( $\times 10^4$ ) and equivalent isotropic displacement parameters ( $\text{\AA}^2 \times 10^3$ ) for  $\alpha$ -BaZn<sub>2</sub>(PO<sub>4</sub>)<sub>2</sub>.

| Atom  | x        | y       | z        | U(eq) <sup>[a]</sup> | BVS <sup>[b, c]</sup> |
|-------|----------|---------|----------|----------------------|-----------------------|
| Ba(1) | 10000    | 0       | 10000    | 32(1)                | 1.804                 |
| Zn(1) | 6667     | 3333    | 13128(4) | 24(1)                | 2.122                 |
| P(1)  | 6667     | 3333    | 7306(8)  | 19(2)                | 5.086                 |
| O(1)  | 6667     | 3333    | 5470(20) | 34(5)                | 2.069                 |
| O(2)  | 5110(30) | 220(60) | 8090(40) | 40(13)               | 1.987                 |
| O(3)  | 6300(90) | 450(80) | 7950(50) | 19(11)               | 2.043                 |

[a] U(eq) is defined as one third of the trace of the orthogonalized U<sub>ij</sub> tensor.

[b] Bond valences calculated with the program Bond Valence Calculator Version 2.00, C. Hormillosa, S. Healy, T. Stephen, McMaster University, 1993;

[c] Valence sums calculated with the formula:  $S_i = \exp[(R_0 - R_i)/B]$ , where  $S_i$  = valence of bond "i" and  $B = 0.37$ .

**Table S4.** Selected bond distances (Å) and angles (deg) for Pb<sub>2</sub>Mg(PO<sub>4</sub>)<sub>2</sub>.

|                   |           |                     |          |
|-------------------|-----------|---------------------|----------|
| Pb(1)-O(8)#1      | 2.324(13) | O(6)-Pb(2)-O(5)     | 82.7(4)  |
| Pb(1)-O(3)        | 2.489(12) | O(6)-Pb(2)-O(4)     | 93.1(4)  |
| Pb(1)-O(1)        | 2.601(13) | O(5)-Pb(2)-O(4)     | 84.9(4)  |
| Pb(1)-O(2)        | 2.628(14) | O(6)-Pb(2)-O(6)#3   | 74.3(4)  |
| Pb(1)-O(4)        | 2.684(12) | O(5)-Pb(2)-O(6)#3   | 152.7(4) |
| Pb(1)-O(5)#6      | 2.787(31) | O(4)-Pb(2)-O(6)#3   | 81.9(4)  |
| Pb(2)-O(6)        | 2.381(12) | O(1)-Mg(1)-O(7)#4   | 88.3(6)  |
| Pb(2)-O(5)        | 2.466(13) | O(1)-Mg(1)-O(3)#5   | 108.0(6) |
| Pb(2)-O(4)        | 2.473(12) | O(7)#4-Mg(1)-O(3)#5 | 90.1(6)  |
| Pb(2)-O(6)#3      | 2.640(12) | O(1)-Mg(1)-O(2)#6   | 87.4(5)  |
| Mg(1)-O(1)        | 1.990(14) | O(7)#4-Mg(1)-O(2)#6 | 172.0(6) |
| Mg(1)-O(7)#4      | 1.995(14) | O(3)#5-Mg(1)-O(2)#6 | 97.6(5)  |
| Mg(1)-O(3)#5      | 2.061(14) | O(1)-Mg(1)-O(5)#4   | 96.6(6)  |
| Mg(1)-O(2)#6      | 2.080(14) | O(7)#4-Mg(1)-O(5)#4 | 82.8(6)  |
| Mg(1)-O(5)#4      | 2.146(15) | O(3)#5-Mg(1)-O(5)#4 | 154.3(6) |
| Mg(1)-O(4)#7      | 2.272(13) | O(2)#6-Mg(1)-O(5)#4 | 91.0(6)  |
| P(1)-O(7)         | 1.503(13) | O(1)-Mg(1)-O(4)#7   | 161.8(6) |
| P(1)-O(4)         | 1.552(13) | O(7)#4-Mg(1)-O(4)#7 | 97.6(5)  |
| P(1)-O(3)         | 1.553(13) | O(3)#5-Mg(1)-O(4)#7 | 89.3(5)  |
| P(1)-O(5)#8       | 1.567(13) | O(2)#6-Mg(1)-O(4)#7 | 84.6(5)  |
| P(2)-O(6)         | 1.521(13) | O(5)#4-Mg(1)-O(4)#7 | 67.3(5)  |
| P(2)-O(2)#3       | 1.546(13) | O(7)-P(1)-O(4)      | 109.6(7) |
| P(2)-O(1)#11      | 1.549(14) | O(7)-P(1)-O(3)      | 114.4(7) |
| P(2)-O(8)         | 1.574(14) | O(4)-P(1)-O(3)      | 106.8(7) |
| O(8)#1-Pb(1)-O(3) | 83.8(4)   | O(7)-P(1)-O(5)#8    | 114.7(7) |
| O(8)#1-Pb(1)-O(1) | 87.5(4)   | O(4)-P(1)-O(5)#8    | 103.6(7) |
| O(3)-Pb(1)-O(1)   | 80.9(4)   | O(3)-P(1)-O(5)#8    | 106.9(7) |
| O(8)#1-Pb(1)-O(2) | 86.8(4)   | O(6)-P(2)-O(2)#3    | 108.8(7) |
| O(3)-Pb(1)-O(2)   | 142.7(4)  | O(6)-P(2)-O(1)#11   | 112.0(7) |
| O(1)-Pb(1)-O(2)   | 134.6(4)  | O(2)#3-P(2)-O(1)#11 | 109.9(7) |

|                   |          |                   |          |
|-------------------|----------|-------------------|----------|
| O(8)#1-Pb(1)-O(4) | 95.7(4)  | O(6)-P(2)-O(8)    | 106.9(7) |
| O(3)-Pb(1)-O(4)   | 57.5(4)  | O(2)#3-P(2)-O(8)  | 111.8(7) |
| O(1)-Pb(1)-O(4)   | 137.5(4) | O(1)#11-P(2)-O(8) | 107.5(7) |
| O(2)-Pb(1)-O(4)   | 87.9(4)  |                   |          |

Symmetry transformations used to generate equivalent atoms:

#1  $-x+1, -y+1, -z+1$     #2  $x-1, y, z$     #3  $-x, -y+1, -z+1$

#4  $-x+1, y+1/2, -z+1/2$     #5  $x, -y+3/2, z+1/2$

#6  $x+1, y, z$     #7  $x+1, -y+3/2, z+1/2$     #8  $-x, -y+1, -z$

#9  $x-1, -y+3/2, z-1/2$     #10  $x, -y+3/2, z-1/2$

#11  $-x+1, y-1/2, -z+1/2$

**Table S5.** Selected bond distances (Å) and angles (deg) for  $\text{Pb}_4\text{Zn}_8(\text{PO}_4)_8$ .

|               |          |                       |            |
|---------------|----------|-----------------------|------------|
| Pb(1)-O(26)   | 2.290(4) | O(18)-Pb(2)-O(15)#1   | 83.54(14)  |
| Pb(1)-O(8)    | 2.348(5) | O(14)-Pb(2)-O(15)#1   | 76.69(15)  |
| Pb(1)-O(23)   | 2.631(4) | O(18)-Pb(2)-O(24)     | 75.14(15)  |
| Pb(1)-O(7)    | 2.692(4) | O(14)-Pb(2)-O(24)     | 70.24(15)  |
| Pb(2)-O(18)   | 2.287(4) | O(15)#1-Pb(2)-O(24)   | 141.30(14) |
| Pb(2)-O(14)   | 2.352(4) | O(31)#2-Pb(3)-O(29)#2 | 86.54(17)  |
| Pb(2)-O(15)#1 | 2.649(4) | O(31)#2-Pb(3)-O(25)   | 73.40(16)  |
| Pb(2)-O(24)   | 2.662(5) | O(29)#2-Pb(3)-O(25)   | 71.20(15)  |
| Pb(3)-O(31)#2 | 2.313(5) | O(31)#2-Pb(3)-O(5)#3  | 85.99(15)  |
| Pb(3)-O(29)#2 | 2.350(4) | O(29)#2-Pb(3)-O(5)#3  | 79.94(15)  |
| Pb(3)-O(25)   | 2.664(4) | O(25)-Pb(3)-O(5)#3    | 145.14(13) |
| Pb(3)-O(5)#3  | 2.683(4) | O(30)#3-Pb(4)-O(28)#3 | 85.41(17)  |
| Pb(4)-O(30)#3 | 2.284(4) | O(30)#3-Pb(4)-O(12)   | 73.39(15)  |
| Pb(4)-O(28)#3 | 2.324(4) | O(28)#3-Pb(4)-O(12)   | 72.06(15)  |
| Pb(4)-O(12)   | 2.610(4) | O(24)#4-Zn(1)-O(16)#4 | 114.9(2)   |
| Zn(1)-O(24)#4 | 1.911(5) | O(24)#4-Zn(1)-O(13)   | 115.8(2)   |
| Zn(1)-O(16)#4 | 1.928(4) | O(16)#4-Zn(1)-O(13)   | 106.77(19) |
| Zn(1)-O(13)   | 1.969(4) | O(24)#4-Zn(1)-O(2)#4  | 106.28(19) |
| Zn(1)-O(2)#4  | 1.974(4) | O(16)#4-Zn(1)-O(2)#4  | 109.69(18) |
| Zn(2)-O(25)#5 | 1.900(4) | O(13)-Zn(1)-O(2)#4    | 102.63(17) |
| Zn(2)-O(11)#4 | 1.918(4) | O(25)#5-Zn(2)-O(11)#4 | 114.3(2)   |
| Zn(2)-O(10)   | 1.956(4) | O(25)#5-Zn(2)-O(10)   | 116.4(2)   |
| Zn(2)-O(13)#4 | 1.973(4) | O(11)#4-Zn(2)-O(10)   | 106.52(18) |
| Zn(3)-O(12)#6 | 1.899(4) | O(25)#5-Zn(2)-O(13)#4 | 106.46(19) |
| Zn(3)-O(20)#1 | 1.922(4) | O(11)#4-Zn(2)-O(13)#4 | 109.64(19) |
| Zn(3)-O(2)#7  | 1.968(4) | O(10)-Zn(2)-O(13)#4   | 102.86(18) |
| Zn(3)-O(6)    | 1.976(4) | O(12)#6-Zn(3)-O(20)#1 | 115.6(2)   |
| Zn(4)-O(27)   | 1.929(4) | O(12)#6-Zn(3)-O(2)#7  | 115.32(19) |
| Zn(4)-O(7)    | 1.937(4) | O(20)#1-Zn(3)-O(2)#7  | 106.61(18) |
| Zn(4)-O(17)#3 | 1.981(4) | O(12)#6-Zn(3)-O(6)    | 106.51(18) |



---

|                |          |                        |            |
|----------------|----------|------------------------|------------|
| Zn(4)-O(1)#8   | 1.998(4) | O(20)#1-Zn(3)-O(6)     | 108.23(19) |
| Zn(5)-O(3)     | 1.937(4) | O(2)#7-Zn(3)-O(6)      | 103.74(18) |
| Zn(5)-O(21)    | 1.953(4) | O(27)-Zn(4)-O(7)       | 104.34(19) |
| Zn(5)-O(32)    | 1.988(5) | O(27)-Zn(4)-O(17)#3    | 105.73(19) |
| Zn(5)-O(22)#9  | 2.002(5) | O(7)-Zn(4)-O(17)#3     | 127.62(17) |
| Zn(6)-O(23)    | 1.906(4) | O(27)-Zn(4)-O(1)#8     | 118.62(18) |
| Zn(6)-O(19)#10 | 1.923(5) | O(7)-Zn(4)-O(1)#8      | 100.12(18) |
| Zn(6)-O(6)#4   | 1.968(4) | O(17)#3-Zn(4)-O(1)#8   | 101.66(19) |
| Zn(6)-O(10)    | 1.982(4) | O(3)-Zn(5)-O(21)       | 102.02(18) |
| Zn(7)-O(5)#10  | 1.935(4) | O(3)-Zn(5)-O(32)       | 117.43(17) |
| Zn(7)-O(4)     | 1.947(4) | O(21)-Zn(5)-O(32)      | 127.86(19) |
| Zn(7)-O(22)    | 1.964(5) | O(3)-Zn(5)-O(22)#9     | 101.92(18) |
| Zn(7)-O(17)#8  | 2.010(4) | O(21)-Zn(5)-O(22)#9    | 103.95(18) |
| Zn(8)-O(15)#1  | 1.943(4) | O(32)-Zn(5)-O(22)#9    | 99.89(18)  |
| Zn(8)-O(9)     | 1.953(4) | O(23)-Zn(6)-O(19)#10   | 114.8(2)   |
| Zn(8)-O(1)#2   | 2.001(4) | O(23)-Zn(6)-O(6)#4     | 115.67(19) |
| Zn(8)-O(32)#11 | 2.018(4) | O(19)#10-Zn(6)-O(6)#4  | 106.8(2)   |
| P(1)-O(18)     | 1.515(5) | O(23)-Zn(6)-O(10)      | 106.33(19) |
| P(1)-O(9)      | 1.534(4) | O(19)#10-Zn(6)-O(10)   | 109.3(2)   |
| P(1)-O(7)      | 1.538(4) | O(6)#4-Zn(6)-O(10)     | 103.23(17) |
| P(1)-O(32)     | 1.574(4) | O(5)#10-Zn(7)-O(4)     | 103.27(18) |
| P(2)-O(26)     | 1.511(5) | O(5)#10-Zn(7)-O(22)    | 128.21(19) |
| P(2)-O(27)     | 1.519(4) | O(4)-Zn(7)-O(22)       | 111.91(18) |
| P(2)-O(15)     | 1.540(4) | O(5)#10-Zn(7)-O(17)#8  | 103.52(18) |
| P(2)-O(22)     | 1.573(5) | O(4)-Zn(7)-O(17)#8     | 105.70(18) |
| P(3)-O(31)     | 1.527(5) | O(22)-Zn(7)-O(17)#8    | 102.09(19) |
| P(3)-O(21)     | 1.536(4) | O(15)#1-Zn(8)-O(9)     | 99.27(18)  |
| P(3)-O(4)      | 1.537(5) | O(15)#1-Zn(8)-O(1)#2   | 134.80(17) |
| P(3)-O(1)      | 1.575(4) | O(9)-Zn(8)-O(1)#2      | 109.67(19) |
| P(4)-O(30)     | 1.518(5) | O(15)#1-Zn(8)-O(32)#11 | 97.70(18)  |
| P(4)-O(3)      | 1.526(5) | O(9)-Zn(8)-O(32)#11    | 119.50(17) |
| P(4)-O(5)      | 1.535(4) | O(1)#2-Zn(8)-O(32)#11  | 97.27(19)  |

---

---

|                |          |                  |          |
|----------------|----------|------------------|----------|
| P(4)-O(17)     | 1.573(4) | O(18)-P(1)-O(9)  | 115.8(2) |
| P(5)-O(14)     | 1.512(4) | O(18)-P(1)-O(7)  | 107.8(3) |
| P(5)-O(19)     | 1.514(4) | O(9)-P(1)-O(7)   | 108.2(3) |
| P(5)-O(25)     | 1.529(5) | O(18)-P(1)-O(32) | 105.5(3) |
| P(5)-O(2)      | 1.568(4) | O(9)-P(1)-O(32)  | 108.6(3) |
| P(6)-O(11)     | 1.522(4) | O(7)-P(1)-O(32)  | 110.9(2) |
| P(6)-O(24)     | 1.523(5) | O(26)-P(2)-O(27) | 114.6(3) |
| P(6)-O(28)     | 1.526(5) | O(26)-P(2)-O(15) | 108.5(3) |
| P(6)-O(6)      | 1.566(4) | O(27)-P(2)-O(15) | 108.1(3) |
| P(7)-O(29)     | 1.511(5) | O(26)-P(2)-O(22) | 106.5(3) |
| P(7)-O(20)     | 1.528(4) | O(27)-P(2)-O(22) | 109.4(3) |
| P(7)-O(23)     | 1.529(4) | O(15)-P(2)-O(22) | 109.5(2) |
| P(7)-O(13)     | 1.569(5) | O(31)-P(3)-O(21) | 107.6(3) |
| P(8)-O(8)      | 1.522(4) | O(31)-P(3)-O(4)  | 114.5(3) |
| P(8)-O(16)     | 1.524(4) | O(21)-P(3)-O(4)  | 109.7(2) |
| P(8)-O(12)     | 1.533(5) | O(31)-P(3)-O(1)  | 106.1(3) |
| P(8)-O(10)     | 1.568(4) | O(21)-P(3)-O(1)  | 110.4(3) |
| O(1)-Zn(4)#9   | 1.998(4) | O(4)-P(3)-O(1)   | 108.4(2) |
| O(1)-Zn(8)#12  | 2.001(4) | O(30)-P(4)-O(3)  | 114.7(3) |
| O(2)-Zn(3)#7   | 1.968(4) | O(30)-P(4)-O(5)  | 107.0(3) |
| O(2)-Zn(1)#4   | 1.974(4) | O(3)-P(4)-O(5)   | 108.7(2) |
| O(5)-Zn(7)#1   | 1.935(4) | O(30)-P(4)-O(17) | 107.1(3) |
| O(5)-Pb(3)#6   | 2.683(4) | O(3)-P(4)-O(17)  | 108.9(2) |
| O(6)-Zn(6)#4   | 1.968(4) | O(5)-P(4)-O(17)  | 110.4(2) |
| O(11)-Zn(2)#4  | 1.917(4) | O(14)-P(5)-O(19) | 115.3(3) |
| O(12)-Zn(3)#3  | 1.899(4) | O(14)-P(5)-O(25) | 105.8(3) |
| O(13)-Zn(2)#4  | 1.973(4) | O(19)-P(5)-O(25) | 110.4(3) |
| O(15)-Zn(8)#10 | 1.943(4) | O(14)-P(5)-O(2)  | 107.7(2) |
| O(15)-Pb(2)#10 | 2.649(4) | O(19)-P(5)-O(2)  | 108.5(3) |
| O(16)-Zn(1)#4  | 1.928(4) | O(25)-P(5)-O(2)  | 108.9(3) |
| O(17)-Zn(4)#6  | 1.981(4) | O(11)-P(6)-O(24) | 110.5(3) |
| O(17)-Zn(7)#9  | 2.010(4) | O(11)-P(6)-O(28) | 114.8(3) |

---

|                   |            |                  |          |
|-------------------|------------|------------------|----------|
| O(19)-Zn(6)#1     | 1.923(5)   | O(24)-P(6)-O(28) | 106.2(3) |
| O(20)-Zn(3)#10    | 1.922(4)   | O(11)-P(6)-O(6)  | 108.3(3) |
| O(22)-Zn(5)#8     | 2.002(5)   | O(24)-P(6)-O(6)  | 108.9(3) |
| O(24)-Zn(1)#4     | 1.911(5)   | O(28)-P(6)-O(6)  | 108.1(3) |
| O(25)-Zn(2)#5     | 1.900(4)   | O(29)-P(7)-O(20) | 115.4(3) |
| O(28)-Pb(4)#6     | 2.324(4)   | O(29)-P(7)-O(23) | 105.7(3) |
| O(29)-Pb(3)#12    | 2.350(4)   | O(20)-P(7)-O(23) | 109.6(3) |
| O(30)-Pb(4)#6     | 2.284(4)   | O(29)-P(7)-O(13) | 108.6(3) |
| O(31)-Pb(3)#12    | 2.313(5)   | O(20)-P(7)-O(13) | 108.1(2) |
| O(32)-Zn(8)#11    | 2.018(4)   | O(23)-P(7)-O(13) | 109.3(2) |
| O(26)-Pb(1)-O(8)  | 86.24(17)  | O(8)-P(8)-O(16)  | 115.0(3) |
| O(26)-Pb(1)-O(23) | 74.12(15)  | O(8)-P(8)-O(12)  | 106.2(3) |
| O(8)-Pb(1)-O(23)  | 71.57(14)  | O(16)-P(8)-O(12) | 110.4(2) |
| O(26)-Pb(1)-O(7)  | 87.34(14)  | O(8)-P(8)-O(10)  | 108.3(2) |
| O(8)-Pb(1)-O(7)   | 75.56(14)  | O(16)-P(8)-O(10) | 108.1(2) |
| O(23)-Pb(1)-O(7)  | 142.98(14) | O(12)-P(8)-O(10) | 108.8(3) |
| O(18)-Pb(2)-O(14) | 86.61(17)  |                  |          |

Symmetry transformations used to generate equivalent atoms:

#1  $x+1/2, y+1/2, z$       #2  $x+1/2, y-1/2, z$

#3  $x, y-1, z$       #4  $-x+1/2, -y+3/2, -z$       #5  $-x+1, -y+1, -z$

#6  $x, y+1, z$       #7  $-x+1, -y+2, -z$       #8  $-x+1/2, y-1/2, -z+1/2$

#9  $-x+1/2, y+1/2, -z+1/2$       #10  $x-1/2, y-1/2, z$

#11       $-x+1, y, -z+1/2$       #12       $x-1/2, y+1/2, z$

**Table S6.** Selected bond distances (Å) and angles (deg) for  $\alpha$ -BaZn<sub>2</sub>(PO<sub>4</sub>)<sub>2</sub>.

|               |           |                       |            |
|---------------|-----------|-----------------------|------------|
| Ba(1)-O(3)#1  | 2.66(6)   | O(3)#6-Ba(1)-O(3)#11  | 180.000(8) |
| Ba(1)-O(3)#2  | 2.66(6)   | O(3)#7-Ba(1)-O(3)#11  | 85.6(11)   |
| Ba(1)-O(3)#3  | 2.66(6)   | O(3)-Ba(1)-O(3)#11    | 102.7(15)  |
| Ba(1)-O(3)#4  | 2.66(6)   | O(3)#8-Ba(1)-O(3)#11  | 54.5(16)   |
| Ba(1)-O(3)#5  | 2.66(6)   | O(3)#9-Ba(1)-O(3)#11  | 37.7(14)   |
| Ba(1)-O(3)#6  | 2.66(6)   | O(3)#10-Ba(1)-O(3)#11 | 85.6(11)   |
| Ba(1)-O(3)#7  | 2.66(6)   | O(1)#12-Zn(1)-O(2)#13 | 121.0(10)  |
| Ba(1)-O(3)    | 2.66(6)   | O(1)#12-Zn(1)-O(2)#3  | 121.0(10)  |
| Ba(1)-O(3)#8  | 2.66(6)   | O(2)#13-Zn(1)-O(2)#3  | 95.8(13)   |
| Ba(1)-O(3)#9  | 2.66(6)   | O(1)#12-Zn(1)-O(2)#14 | 121.0(10)  |
| Ba(1)-O(3)#10 | 2.66(6)   | O(2)#13-Zn(1)-O(2)#14 | 95.8(14)   |
| Ba(1)-O(3)#11 | 2.66(6)   | O(2)#3-Zn(1)-O(2)#14  | 95.8(14)   |
| Zn(1)-O(1)#12 | 1.884(17) | O(1)#12-Zn(1)-O(3)#6  | 115.4(11)  |
| Zn(1)-O(2)#13 | 1.90(3)   | O(2)#13-Zn(1)-O(3)#6  | 17.0(12)   |
| Zn(1)-O(2)#3  | 1.90(3)   | O(2)#3-Zn(1)-O(3)#6   | 86.4(13)   |
| Zn(1)-O(2)#14 | 1.90(3)   | O(2)#14-Zn(1)-O(3)#6  | 110.9(12)  |
| Zn(1)-O(3)#6  | 2.03(3)   | O(1)#12-Zn(1)-O(3)#13 | 115.4(12)  |
| Zn(1)-O(3)#13 | 2.03(3)   | O(2)#13-Zn(1)-O(3)#13 | 17.0(12)   |
| Zn(1)-O(3)#3  | 2.03(3)   | O(2)#3-Zn(1)-O(3)#13  | 110.9(11)  |
| Zn(1)-O(3)#15 | 2.03(3)   | O(2)#14-Zn(1)-O(3)#13 | 86.4(13)   |
| Zn(1)-O(3)#16 | 2.03(3)   | O(3)#6-Zn(1)-O(3)#13  | 33(3)      |
| Zn(1)-O(3)#14 | 2.03(3)   | O(1)#12-Zn(1)-O(3)#3  | 115.4(11)  |
| P(1)-O(1)     | 1.479(17) | O(2)#13-Zn(1)-O(3)#3  | 86.4(13)   |
| P(1)-O(3)#10  | 1.53(5)   | O(2)#3-Zn(1)-O(3)#3   | 17.0(12)   |
| P(1)-O(3)#18  | 1.53(5)   | O(2)#14-Zn(1)-O(3)#3  | 110.9(12)  |
| P(1)-O(3)#19  | 1.53(5)   | O(3)#6-Zn(1)-O(3)#3   | 74(3)      |
| P(1)-O(3)#20  | 1.53(5)   | O(3)#13-Zn(1)-O(3)#3  | 103.0(14)  |
| P(1)-O(3)     | 1.53(5)   | O(1)#12-Zn(1)-O(3)#15 | 115.4(12)  |
| P(1)-O(3)#21  | 1.53(5)   | O(2)#13-Zn(1)-O(3)#15 | 110.9(12)  |
| P(1)-O(2)#18  | 1.56(3)   | O(2)#3-Zn(1)-O(3)#15  | 17.0(12)   |
| P(1)-O(2)     | 1.56(3)   | O(2)#14-Zn(1)-O(3)#15 | 86.4(13)   |

---

|                     |            |                       |           |
|---------------------|------------|-----------------------|-----------|
| P(1)-O(2)#20        | 1.56(3)    | O(3)#6-Zn(1)-O(3)#15  | 103.0(14) |
| O(1)-Zn(1)#23       | 1.884(17)  | O(3)#13-Zn(1)-O(3)#15 | 124.4(19) |
| O(2)-Zn(1)#13       | 1.90(3)    | O(3)#3-Zn(1)-O(3)#15  | 33(3)     |
| O(2)-Ba(1)#17       | 3.066(16)  | O(1)#12-Zn(1)-O(3)#16 | 115.4(11) |
| O(3)-Zn(1)#13       | 2.03(3)    | O(2)#13-Zn(1)-O(3)#16 | 86.4(13)  |
| O(3)#1-Ba(1)-O(3)#2 | 54.5(16)   | O(2)#3-Zn(1)-O(3)#16  | 110.9(12) |
| O(3)#1-Ba(1)-O(3)#3 | 85.6(11)   | O(2)#14-Zn(1)-O(3)#16 | 17.0(12)  |
| O(3)#2-Ba(1)-O(3)#3 | 37.7(14)   | O(3)#6-Zn(1)-O(3)#16  | 103.0(14) |
| O(3)#1-Ba(1)-O(3)#4 | 85.6(11)   | O(3)#13-Zn(1)-O(3)#16 | 74(3)     |
| O(3)#2-Ba(1)-O(3)#4 | 102.7(15)  | O(3)#3-Zn(1)-O(3)#16  | 124.4(19) |
| O(3)#3-Ba(1)-O(3)#4 | 85.6(11)   | O(3)#15-Zn(1)-O(3)#16 | 103.0(14) |
| O(3)#1-Ba(1)-O(3)#5 | 37.7(14)   | O(1)#12-Zn(1)-O(3)#14 | 115.4(11) |
| O(3)#2-Ba(1)-O(3)#5 | 85.6(11)   | O(2)#13-Zn(1)-O(3)#14 | 110.9(12) |
| O(3)#3-Ba(1)-O(3)#5 | 102.7(15)  | O(2)#3-Zn(1)-O(3)#14  | 86.4(13)  |
| O(3)#4-Ba(1)-O(3)#5 | 54.5(16)   | O(2)#14-Zn(1)-O(3)#14 | 17.0(12)  |
| O(3)#1-Ba(1)-O(3)#6 | 102.7(15)  | O(3)#6-Zn(1)-O(3)#14  | 124.4(19) |
| O(3)#2-Ba(1)-O(3)#6 | 85.6(11)   | O(3)#13-Zn(1)-O(3)#14 | 103.0(13) |
| O(3)#3-Ba(1)-O(3)#6 | 54.5(16)   | O(3)#3-Zn(1)-O(3)#14  | 103.0(14) |
| O(3)#4-Ba(1)-O(3)#6 | 37.7(14)   | O(3)#15-Zn(1)-O(3)#14 | 74(3)     |
| O(3)#5-Ba(1)-O(3)#6 | 85.6(11)   | O(3)#16-Zn(1)-O(3)#14 | 33(3)     |
| O(3)#1-Ba(1)-O(3)#7 | 125.5(16)  | O(1)-P(1)-O(3)#10     | 109.8(14) |
| O(3)#2-Ba(1)-O(3)#7 | 180.000(5) | O(1)-P(1)-O(3)#18     | 109.8(14) |
| O(3)#3-Ba(1)-O(3)#7 | 142.3(14)  | O(3)#10-P(1)-O(3)#18  | 44(3)     |
| O(3)#4-Ba(1)-O(3)#7 | 77.3(15)   | O(1)-P(1)-O(3)#19     | 109.8(14) |
| O(3)#5-Ba(1)-O(3)#7 | 94.4(11)   | O(3)#10-P(1)-O(3)#19  | 109.1(14) |
| O(3)#6-Ba(1)-O(3)#7 | 94.4(11)   | O(3)#18-P(1)-O(3)#19  | 68(3)     |
| O(3)#1-Ba(1)-O(3)   | 180.000(7) | O(1)-P(1)-O(3)#20     | 109.8(14) |
| O(3)#2-Ba(1)-O(3)   | 125.5(16)  | O(3)#10-P(1)-O(3)#20  | 138(3)    |
| O(3)#3-Ba(1)-O(3)   | 94.4(11)   | O(3)#18-P(1)-O(3)#20  | 109.1(14) |
| O(3)#4-Ba(1)-O(3)   | 94.4(11)   | O(3)#19-P(1)-O(3)#20  | 44(3)     |
| O(3)#5-Ba(1)-O(3)   | 142.3(15)  | O(1)-P(1)-O(3)        | 109.8(14) |
| O(3)#6-Ba(1)-O(3)   | 77.3(15)   | O(3)#10-P(1)-O(3)     | 68(3)     |

---

---

|                      |            |                      |           |
|----------------------|------------|----------------------|-----------|
| O(3)#7-Ba(1)-O(3)    | 54.5(16)   | O(3)#18-P(1)-O(3)    | 109.1(14) |
| O(3)#1-Ba(1)-O(3)#8  | 94.4(11)   | O(3)#19-P(1)-O(3)    | 138(3)    |
| O(3)#2-Ba(1)-O(3)#8  | 142.3(14)  | O(3)#20-P(1)-O(3)    | 109.1(14) |
| O(3)#3-Ba(1)-O(3)#8  | 180.000(7) | O(1)-P(1)-O(3)#21    | 109.8(14) |
| O(3)#4-Ba(1)-O(3)#8  | 94.4(11)   | O(3)#10-P(1)-O(3)#21 | 109.1(14) |
| O(3)#5-Ba(1)-O(3)#8  | 77.3(15)   | O(3)#18-P(1)-O(3)#21 | 138(3)    |
| O(3)#6-Ba(1)-O(3)#8  | 125.5(16)  | O(3)#19-P(1)-O(3)#21 | 109.1(14) |
| O(3)#7-Ba(1)-O(3)#8  | 37.7(14)   | O(3)#20-P(1)-O(3)#21 | 68(3)     |
| O(3)-Ba(1)-O(3)#8    | 85.6(11)   | O(3)-P(1)-O(3)#21    | 44(3)     |
| O(3)#1-Ba(1)-O(3)#9  | 94.4(11)   | O(1)-P(1)-O(2)#18    | 113.8(11) |
| O(3)#2-Ba(1)-O(3)#9  | 77.3(15)   | O(3)#10-P(1)-O(2)#18 | 22.0(15)  |
| O(3)#3-Ba(1)-O(3)#9  | 94.4(11)   | O(3)#18-P(1)-O(2)#18 | 22.0(15)  |
| O(3)#4-Ba(1)-O(3)#9  | 180.0(18)  | O(3)#19-P(1)-O(2)#18 | 87.8(15)  |
| O(3)#5-Ba(1)-O(3)#9  | 125.5(16)  | O(3)#20-P(1)-O(2)#18 | 123.6(14) |
| O(3)#6-Ba(1)-O(3)#9  | 142.3(14)  | O(3)-P(1)-O(2)#18    | 87.8(15)  |
| O(3)#7-Ba(1)-O(3)#9  | 102.7(15)  | O(3)#21-P(1)-O(2)#18 | 123.6(14) |
| O(3)-Ba(1)-O(3)#9    | 85.6(11)   | O(1)-P(1)-O(2)       | 113.8(11) |
| O(3)#8-Ba(1)-O(3)#9  | 85.6(11)   | O(3)#10-P(1)-O(2)    | 87.8(15)  |
| O(3)#1-Ba(1)-O(3)#10 | 142.3(15)  | O(3)#18-P(1)-O(2)    | 123.6(14) |
| O(3)#2-Ba(1)-O(3)#10 | 94.4(11)   | O(3)#19-P(1)-O(2)    | 123.6(14) |
| O(3)#3-Ba(1)-O(3)#10 | 77.3(15)   | O(3)#20-P(1)-O(2)    | 87.8(15)  |
| O(3)#4-Ba(1)-O(3)#10 | 125.5(16)  | O(3)-P(1)-O(2)       | 22.0(15)  |
| O(3)#5-Ba(1)-O(3)#10 | 180.000(9) | O(3)#21-P(1)-O(2)    | 22.0(15)  |
| O(3)#6-Ba(1)-O(3)#10 | 94.4(11)   | O(2)#18-P(1)-O(2)    | 104.8(13) |
| O(3)#7-Ba(1)-O(3)#10 | 85.6(11)   | O(1)-P(1)-O(2)#20    | 113.8(11) |
| O(3)-Ba(1)-O(3)#10   | 37.7(14)   | O(3)#10-P(1)-O(2)#20 | 123.6(14) |
| O(3)#8-Ba(1)-O(3)#10 | 102.7(15)  | O(3)#18-P(1)-O(2)#20 | 87.8(15)  |
| O(3)#9-Ba(1)-O(3)#10 | 54.5(16)   | O(3)#19-P(1)-O(2)#20 | 22.0(15)  |
| O(3)#1-Ba(1)-O(3)#11 | 77.3(15)   | O(3)#20-P(1)-O(2)#20 | 22.0(15)  |
| O(3)#2-Ba(1)-O(3)#11 | 94.4(11)   | O(3)-P(1)-O(2)#20    | 123.6(14) |
| O(3)#3-Ba(1)-O(3)#11 | 125.5(16)  | O(3)#21-P(1)-O(2)#20 | 87.8(14)  |
| O(3)#4-Ba(1)-O(3)#11 | 142.3(14)  | O(2)#18-P(1)-O(2)#20 | 104.8(13) |

---

Symmetry transformations used to generate equivalent atoms:

#1  $-x+2,-y,-z+2$     #2  $-x+2,-x+y+1,-z+2$

#3  $y+1,-x+y+1,-z+2$     #4  $x-y,x-1,-z+2$

#5  $y+1,x-1,-z+2$     #6  $x-y,-y,-z+2$     #7  $x,x-y-1,z$

#8  $-y+1,x-y-1,z$     #9  $-x+y+2,-x+1,z$

#10  $-y+1,-x+1,z$     #11  $-x+y+2,y,z$     #12  $x,y,z+1$

#13  $-x+1,-y,-z+2$     #14  $x-y,x,-z+2$     #15  $y+1,x,-z+2$

#16  $-x+1,-x+y+1,-z+2$     #17  $x-1,y,z$

#18  $-y+1,x-y,z$     #19  $x,x-y,z$     #20  $-x+y+1,-x+1,z$

#21  $-x+y+1,y,z$     #22  $x,y+1,z$     #23  $x,y,z-1$

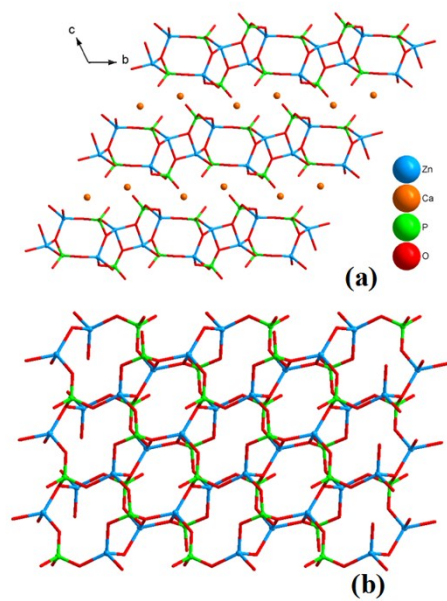

**Figure S1.** (a) Crystal structure of  $\text{CaZn}_2(\text{PO}_4)_2$ . (b) The  $[\text{Zn}_2\text{P}_2\text{O}_8]_\infty$  layer.



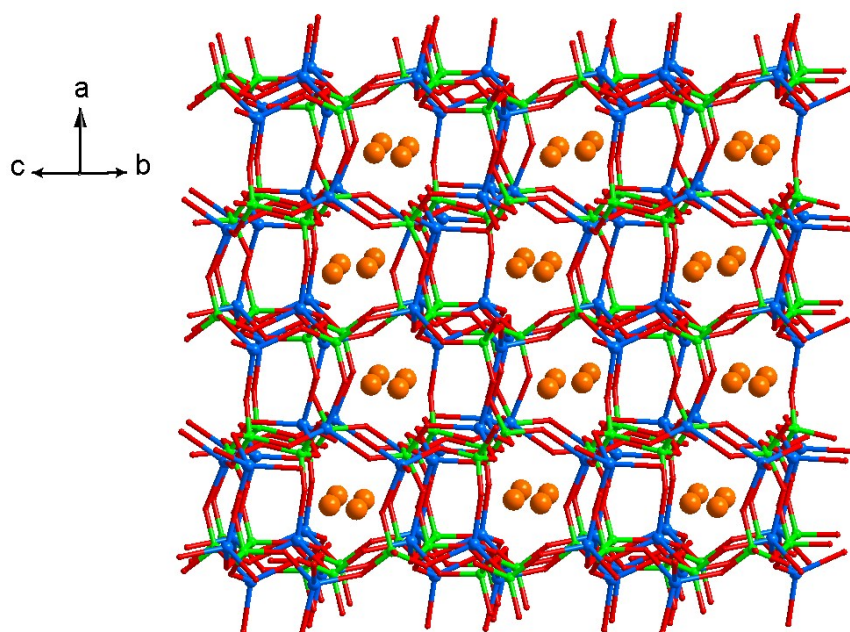

**Figure S2.** Crystal structure of  $\beta$ -BaZn<sub>2</sub>(PO<sub>4</sub>)<sub>2</sub> and SrZn<sub>2</sub>(PO<sub>4</sub>)<sub>2</sub>, Ba or Sr atoms are represented by orange, Zn, P and O atoms are represented by light blue, bright green and red, respectively.

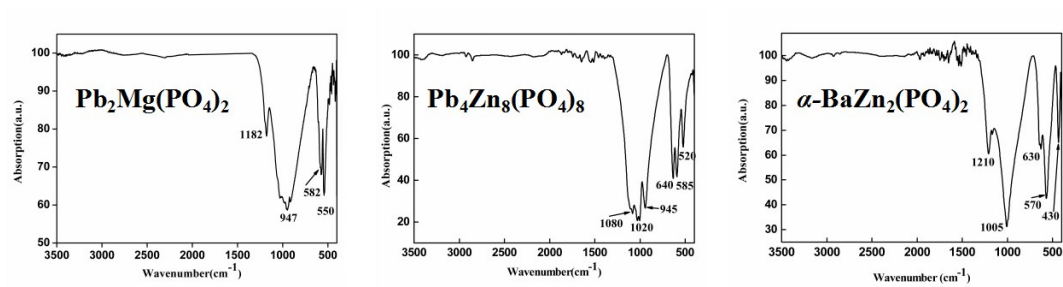

**Figure S3.** IR Spectroscopy of  $\text{Pb}_2\text{Mg}(\text{PO}_4)_2$ ,  $\text{Pb}_4\text{Zn}_8(\text{PO}_4)_8$  and  $\alpha\text{-BaZn}_2(\text{PO}_4)_2$ .

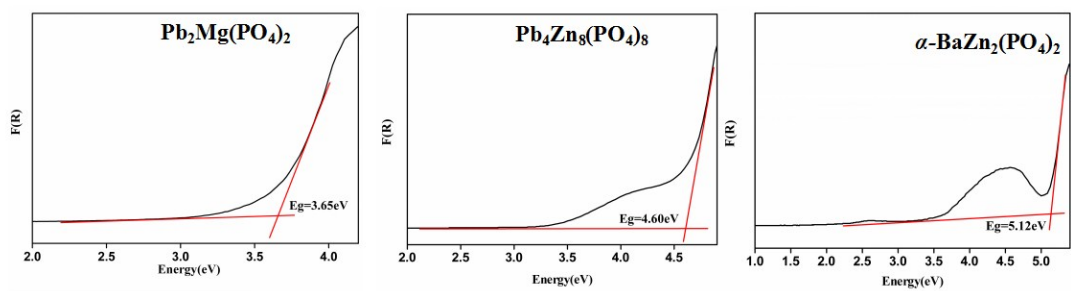

**Figure S4.** Absorption spectra for  $Pb_2Mg(PO_4)_2$ ,  $Pb_4Zn_8(PO_4)_8$  and  $\alpha-BaZn_2(PO_4)_2$ .

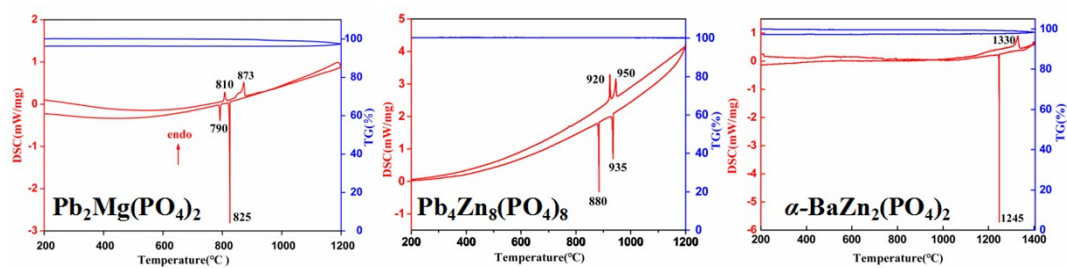

**Figure S5.** TGA and DSC curves of  $\text{Pb}_2\text{Mg}(\text{PO}_4)_2$ ,  $\text{Pb}_4\text{Zn}_8(\text{PO}_4)_8$  and  $\alpha\text{-BaZn}_2(\text{PO}_4)_2$ .

(TGA curves are represented by blue lines, and DSC curves are represented by red lines.)

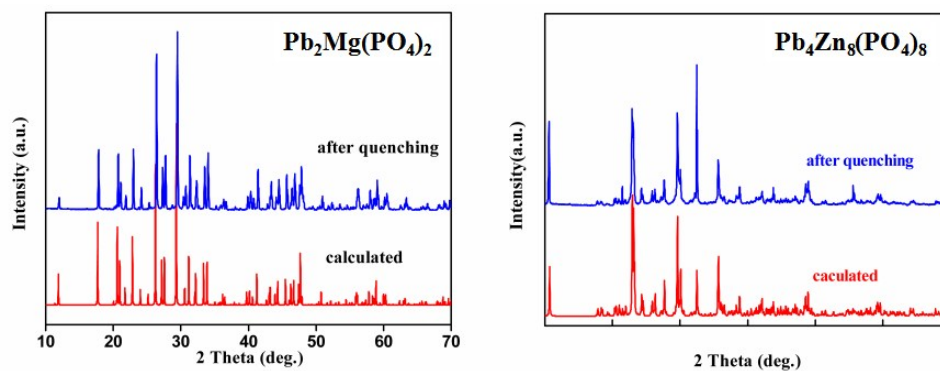

**Figure S6.** The XRD patterns of  $\text{Pb}_2\text{Mg}(\text{PO}_4)_2$  and  $\text{Pb}_4\text{Zn}_8(\text{PO}_4)_8$  samples after quenching.
